# Supplementary material for: Establishment of an isotope dilution LC-MS/MS method revealing kinetics and distribution of co-occurring mycotoxins in rats
Source: Royal Society of Chemistry journal article supplement (doi:10.1039/c2ay25891a), 2012-01-01
Supplement: c2ay25891a.pdf [file c2ay25891a.pdf]

## Supporting Information

Supporting information for the article “Establishment of an isotope dilution LC-MS/MS method revealing kinetics and distribution of co-occurring mycotoxins in rat” by Zheng Han, Gang Liu, Zhiyong Zhao, Jingbo Zhang, Yucai Liao, Jianxin Shi, Dabing Zhang, Suquan Song, Sarah De Saeger, Aibo Wu.

Corresponding Author:

Aibo Wu, Institute for Agri-food Standards and Testing Technology, Shanghai Academy of Agricultural Sciences, 1018 Jinqi Road, Shanghai 201403, P. R. China.

Phone: +86-21-62202875; Fax: +86-21-62203612; Email: [wuaibo@saas.sh.cn](mailto:wuaibo@saas.sh.cn).

## Captions

**Fig. S-1.** Chemical structures of AFB1 (a) and T-2 (b) and the MS/MS spectrometry of AFB1 (c) and T-2 (d).

**Table S-1** Factors, levels and the results of the orthogonal experiment  $L_9(3^4)$ .

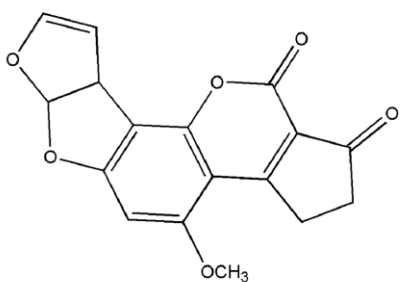

(a)

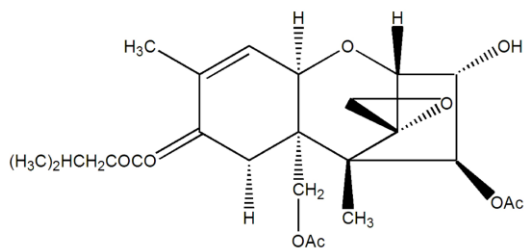

(b)

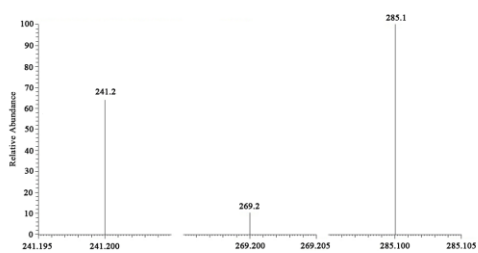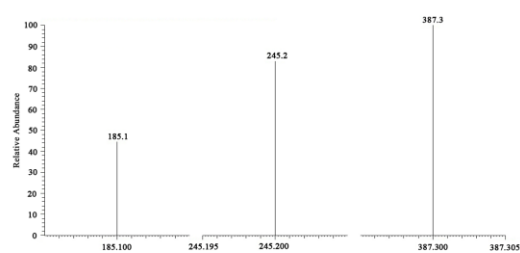

**Fig. S-1.** Chemical structures of AFB1 (a) and T-2 (b) and the MS/MS spectrometry of AFB1 (c) and T-2 (d).

**Table S-1** Factors, levels and the results of the orthogonal experiment  $L_9(3^4)$ .

| Levels                                | Factors                              |                                             |                                             |                        | 4<br>Blank                               |
|---------------------------------------|--------------------------------------|---------------------------------------------|---------------------------------------------|------------------------|------------------------------------------|
|                                       | 1<br>Ratio<br>(silica gel/ florisil) | 2<br>Quantity of total<br>materials<br>(mg) | 3<br>Quantity of elution<br>solvent<br>(mL) | 4                      |                                          |
| 1                                     | 9/1                                  | 0.1                                         | 1                                           |                        |                                          |
| 2                                     | 7/3                                  | 0.3                                         | 2                                           |                        |                                          |
| 3                                     | 5/5                                  | 0.5                                         | 3                                           |                        |                                          |
| Run                                   | 1                                    | 2                                           | 3                                           | 4                      | Total contents<br>(ng mL <sup>-1</sup> ) |
| 1                                     | 1                                    | 1                                           | 1                                           |                        | 2.269                                    |
| 2                                     | 1                                    | 2                                           | 2                                           |                        | 2.077                                    |
| 3                                     | 1                                    | 3                                           | 3                                           |                        | 2.466                                    |
| 4                                     | 2                                    | 1                                           | 2                                           |                        | 2.262                                    |
| 5                                     | 2                                    | 2                                           | 3                                           |                        | 2.066                                    |
| 6                                     | 2                                    | 3                                           | 1                                           |                        | 1.267                                    |
| 7                                     | 3                                    | 1                                           | 3                                           |                        | 2.518                                    |
| 8                                     | 3                                    | 2                                           | 1                                           |                        | 1.318                                    |
| 9                                     | 3                                    | 3                                           | 2                                           |                        | 1.822                                    |
| $\bar{X}_1$<br>(ng mL <sup>-1</sup> ) | 2.271                                | 2.350                                       | 1.618                                       | 2.052                  |                                          |
| $\bar{X}_2$<br>(ng mL <sup>-1</sup> ) | 1.865                                | 1.820                                       | 2.054                                       | 1.954                  |                                          |
| $\bar{X}_3$<br>(ng mL <sup>-1</sup> ) | 1.886                                | 1.852                                       | 2.350                                       | 2.015                  |                                          |
| Range                                 | 0.406                                | 0.530                                       | 0.732                                       | 0.098                  |                                          |
| Factors                               | Sum of SSE <sup>2</sup>              | Degree of<br>freedom                        | F                                           | Critical Value<br>of F | Significance                             |
| Ratio                                 | 0.313                                | 2                                           | 20.867                                      | 19.000                 | *                                        |
| Quantity of<br>total materials        | 0.529                                | 2                                           | 35.267                                      | 19.000                 | *                                        |
| Quantity of<br>elution<br>solvent     | 0.813                                | 2                                           | 54.200                                      | 19.000                 | *                                        |
| Error                                 | 0.01                                 | 2                                           |                                             |                        |                                          |
